# Supplementary material for: Nonlinear relationships between the triglyceride glucose-body mass index and cardiovascular disease in middle-aged and elderly women from NHANES (1999–2018)
Source: Springer Nature journal article supplement (doi:10.1038/s41598-025-95677-5), 2025-03-31
Supplement: MOESM1 [file 41598_2025_95677_MOESM1_ESM.pdf]

1 **Nonlinear relationships between the triglyceride glucose-body mass index and cardiovascular**  
2 **disease in middle-aged and elderly women from NHANES (1999-2018)**  
3 Chunxue Li<sup>a</sup>, Qiuxia Lin<sup>a</sup>, Chunli Wan<sup>a</sup>, Lin Li<sup>a\*</sup>

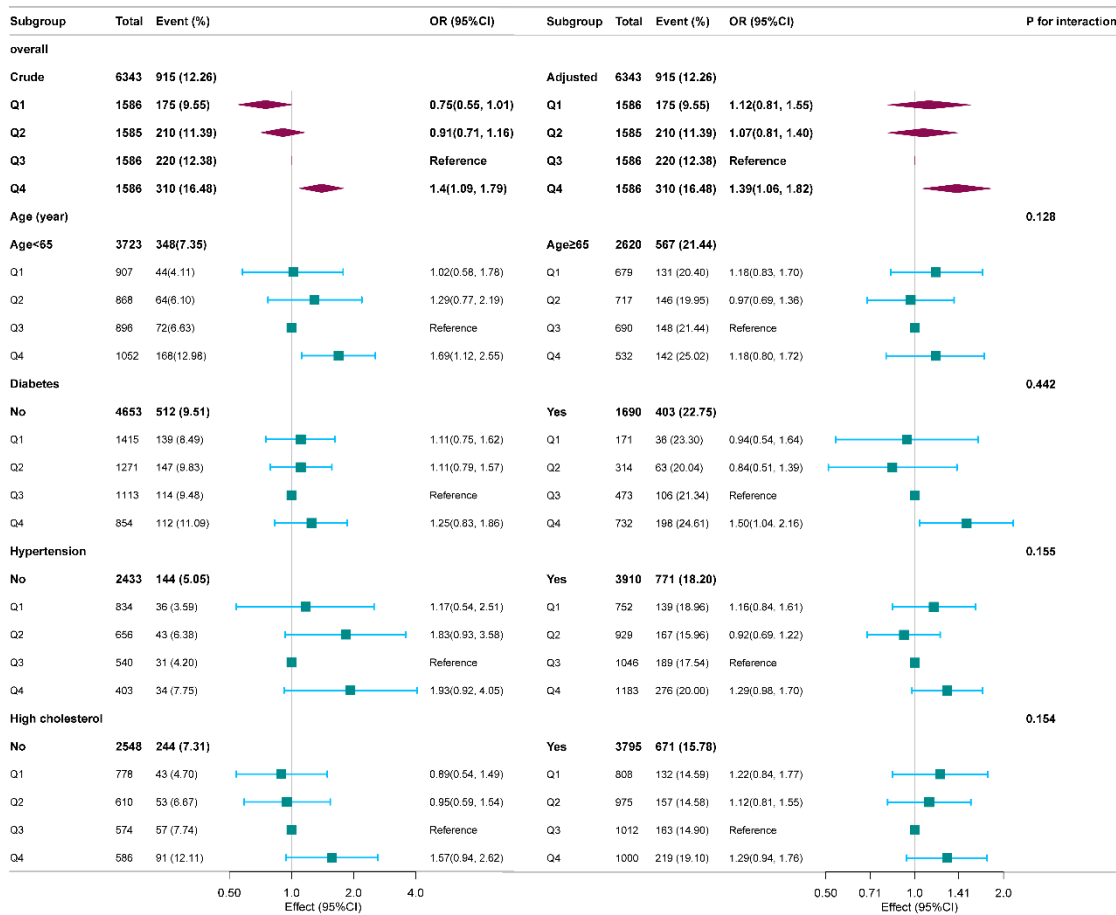

8  
9 **Supplementary Figure 1.** Subgroup Analysis for the Association between TyG-BMI and CVD.  
10 For each 10-unit increase in the TyG-BMI  
11 Data are presented as unweighted number (weighted percentage).  
12 They were adjusted for age, family income, smoking status, alcohol use, physical activity, diabetes, hypertension, high  
13 cholesterol, LDL-C, HDL-C, and HbA1c.

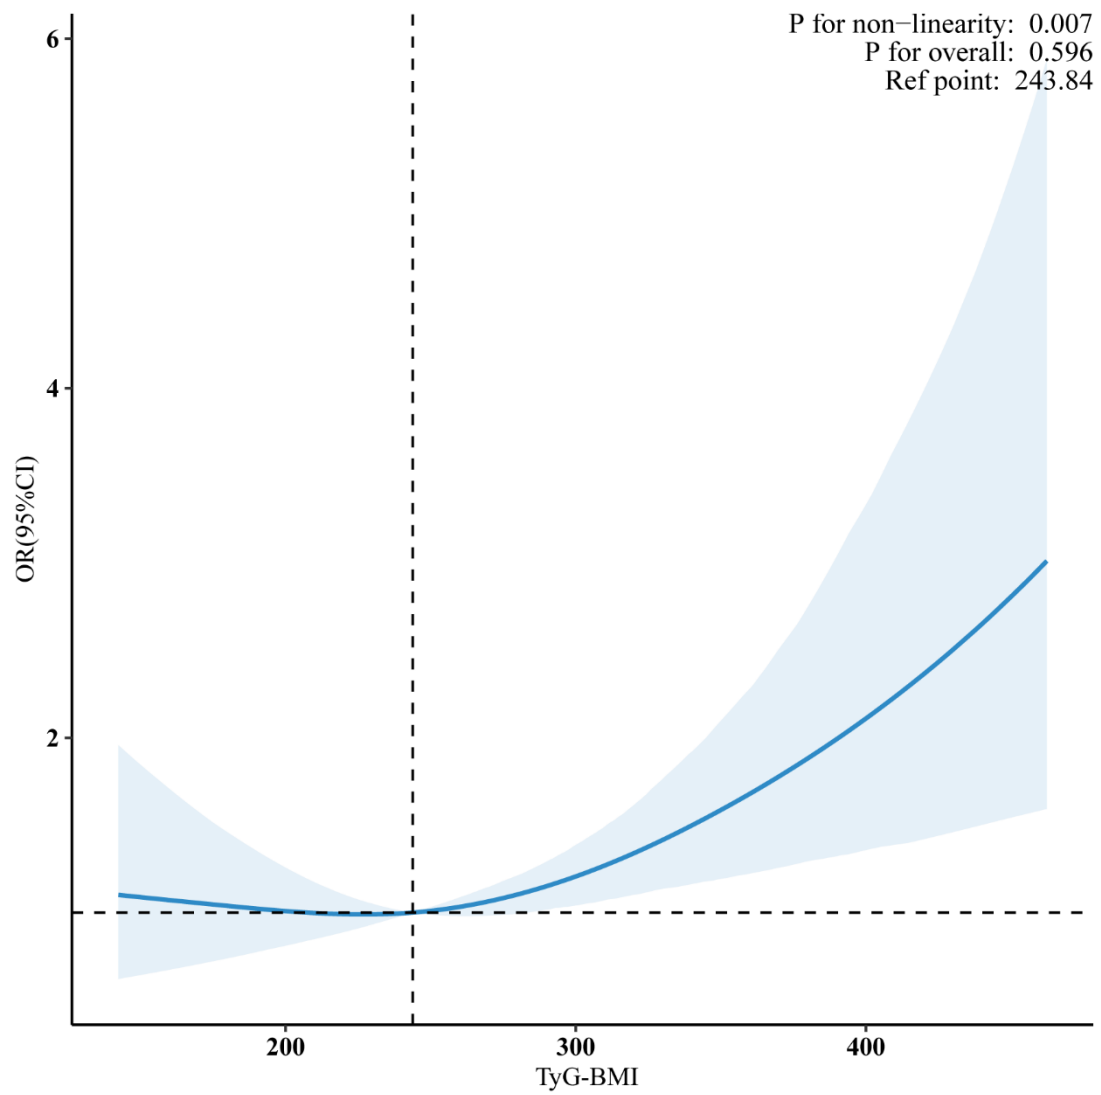

**Supplementary Figure 2.** Restricted Cubic Spline Analysis of TyG-BMI and CVD Odds (2,787 participants)

Solid and shaded represent the predicted value and 95% CI. They were adjusted for age, family income, smoking status, alcohol use, physical activity, diabetes, hypertension, high cholesterol, LDL-C, HDL-C, and HbA1c, and 99% of the data is shown.

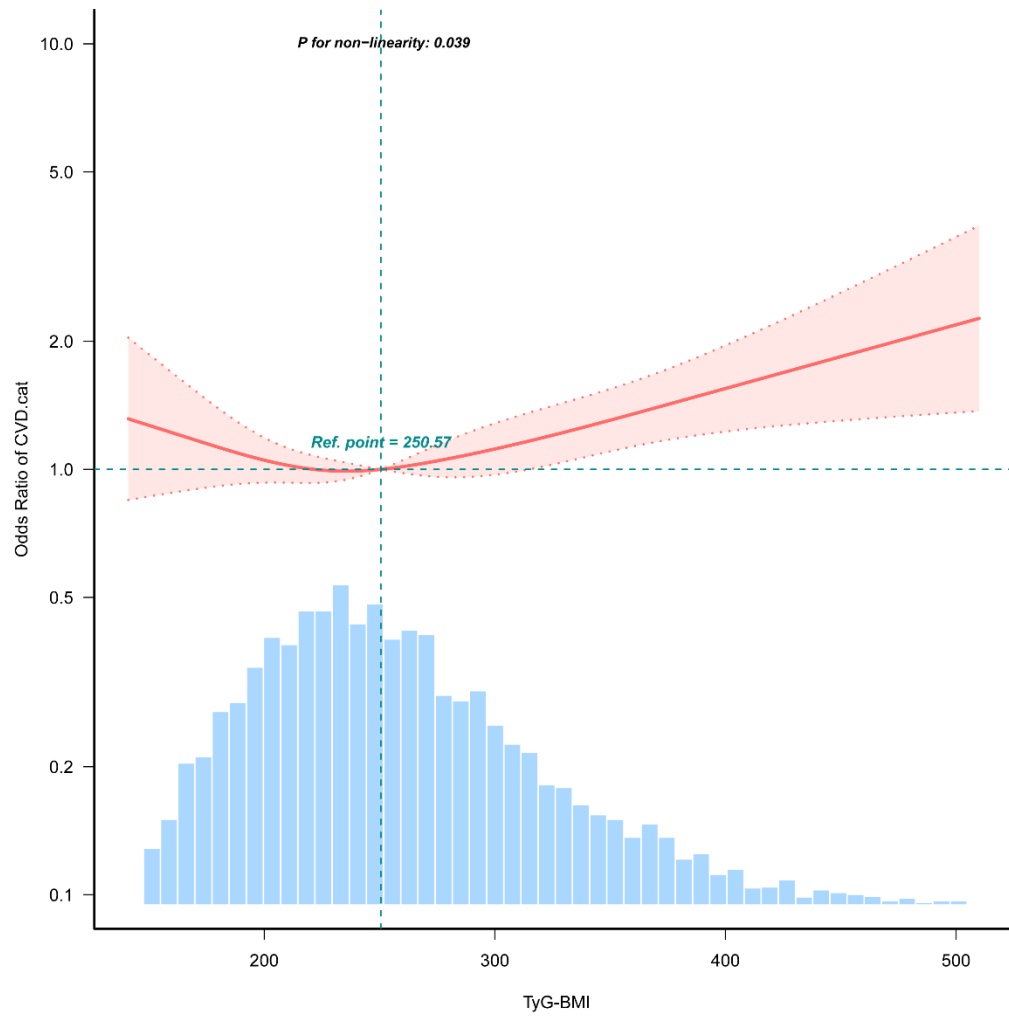

21

22 **Supplementary Figure 3.** Restricted Cubic Spline Analysis of TyG-BMI and CVD Odds (unweighted)

23 Solid and dashed lines represent the predicted value and 95% CI. They were adjusted for age, family income, smoking status,

24 alcohol use, physical activity, diabetes, hypertension, high cholesterol, LDL-C, HDL-C, and HbA1c, and 99% of the data is show

**Supplementary Table 1. Covariate Screening.**

| Covariate              | Coefficient | Change (%) | GVIF  | DF | GVIF <sup>1/(2*DF)</sup> | Colinearity | Selection | VIF Selection |
|------------------------|-------------|------------|-------|----|--------------------------|-------------|-----------|---------------|
| Crude                  | 0           | Ref.       | 1.433 | 1  | 1.197                    | 0           | Ref.      | Ref.          |
| Age                    | 0           | 42.9       | 1.808 | 1  | 1.344                    | 0           | Yes       | Yes           |
| Race/ethnicity         | 0           | -1.9       | 1.803 | 4  | 1.076                    | 0           | No        | No            |
| Marital status         | 0           | -3.4       | 1.175 | 1  | 1.084                    | 0           | No        | No            |
| Education level        | 0           | -5.2       | 1.652 | 2  | 1.134                    | 0           | No        | No            |
| Family income          | 0           | -16.2      | 1.477 | 2  | 1.102                    | 0           | Yes       | Yes           |
| Smoking status         | 0           | -1.5       | 1.534 | 2  | 1.113                    | 0           | Yes       | Yes           |
| Alcohol use            | 0           | -9.6       | 1.524 | 4  | 1.054                    | 0           | Yes       | Yes           |
| Physical activity      | 0           | 25.6       | 1.108 | 1  | 1.053                    | 0           | Yes       | Yes           |
| Diabetes               | 0           | -52.2      | 1.29  | 1  | 1.136                    | 0           | Yes       | Yes           |
| Hypertension           | 0           | -38.1      | 1.117 | 1  | 1.057                    | 0           | Yes       | Yes           |
| High cholesterol       | 0           | -9.2       | 1.114 | 1  | 1.055                    | 0           | Yes       | Yes           |
| LDL-C                  | 0           | -3.1       | 1.148 | 1  | 1.072                    | 0           | Yes       | Yes           |
| HDL-C                  | 0           | -20.9      | 1.272 | 1  | 1.128                    | 0           | Yes       | Yes           |
| Cancer or malignancy   | 0           | 1          | 1.101 | 1  | 1.049                    | 0           | No        | No            |
| Postmenopausal         | 0           | 0.2        | 1.229 | 1  | 1.108                    | 0           | No        | No            |
| Number of pregnancies. | 0           | -4.5       | 1.168 | 3  | 1.026                    | 0           | No        | No            |
| HbA1c                  | 0           | -24.4      | 1.604 | 1  | 1.266                    | 0           | Yes       | Yes           |

**Supplementary Table 2.** Multivariable Logistic Regression Analysis of TyG-BMI and CVD Odds (2787 participants)

| Variable          | Total No. | Event (%)  | Model 1          | Model 2 |                  | Model 3 |                   | Model 4 |                  |         |
|-------------------|-----------|------------|------------------|---------|------------------|---------|-------------------|---------|------------------|---------|
|                   |           |            | OR(95%CI)        | P value | OR(95%CI)        | P value | OR(95%CI)         | P value | OR(95%CI)        | P value |
| TyG-BMI*          | 2,787     | 317(9.70)  | 1.05(1.03, 1.07) | <0.001  | 1.06(1.04, 1.09) | <0.001  | 1.06(1.03, 1.08)  | <0.001  | 1.03(1.01, 1.06) | 0.018   |
| TyG-BMI(Quantile) |           |            |                  |         |                  |         |                   |         |                  |         |
| <211.20           | 794       | 68(6.86)   | 0.79(0.52, 1.22) | 0.286   | 0.82(0.53, 1.27) | 0.381   | 0.89(0.58, 1.37)  | 0.587   | 1.18(0.75, 1.85) | 0.467   |
| 211.20~250.74     | 717       | 79(9.82)   | 1.17(0.78, 1.78) | 0.447   | 1.15(0.74, 1.78) | 0.539   | 1.26(0.79, 1.980) | 0.327   | 1.55(1.00, 2.41) | 0.051   |
| 250.75~298.71     | 683       | 66(8.49)   | Reference        |         | Reference        |         | Reference         |         | Reference        |         |
| >298.71           | 593       | 104(15.77) | 2.02(1.31, 3.12) | 0.002   | 2.52(1.61, 3.95) | <0.001  | 2.59(1.64, 4.10)  | <0.001  | 2.27(1.40, 3.69) | 0.001   |

\*For each 10-unit increase in the TyG-BMI

Model 1 was without covariate adjustment.

Model 2 was adjusted for age.

Model 3 was adjusted for age, family income, smoking status, alcohol use, physical activity.

Model 4 was adjusted for age, family income, smoking status, alcohol use, physical activity, diabetes, hypertension, high cholesterol, LDL-C, HDL-C, and HbA1c

Data are presented as unweighted number (weighted percentage)

TyG-BMI: triglyceride glucose-body mass index      CVD: cardiovascular disease

**Supplementary Table 3.** Multivariable Logistic Regression Analysis of TyG-BMI and CVD Odds (unweighted)

| Variable          | Total No. | Event (%)    | Model 1          |         | Model 2          |         | Model 3          |         | Model 4          |         |
|-------------------|-----------|--------------|------------------|---------|------------------|---------|------------------|---------|------------------|---------|
|                   |           |              | OR(95%CI)        | P value | OR(95%CI)        | P value | OR(95%CI)        | P value | OR(95%CI)        | P value |
| TyG-BMI*          | 6,795     | 1,027 (15.1) | 1.04 (1.03~1.04) | <0.001  | 1.05 (1.04~1.06) | <0.001  | 1.06 (1.04~1.08) | <0.001  | 1.03 (1.01~1.06) | 0.002   |
| TyG-BMI(Quantile) |           |              |                  |         |                  |         |                  |         |                  |         |
| <211.20           | 1,704     | 193 (11.3)   | 0.76 (0.62~0.93) | 0.008   | 0.73 (0.6~0.9)   | 0.003   | 0.81 (0.58~1.14) | 0.23    | 1.21 (0.81~1.8)  | 0.344   |
| 211.20~250.74     | 1,698     | 247 (14.5)   | 1.01 (0.84~1.23) | 0.889   | 0.95 (0.78~1.16) | 0.634   | 1.09 (0.79~1.51) | 0.603   | 1.42 (0.99~2.04) | 0.059   |
| 250.75~298.71     | 1,697     | 244 (14.4)   | Reference        |         | Reference        |         | Reference        |         | Reference        |         |
| >298.71           | 1,696     | 343 (20.2)   | 1.51 (1.26~1.81) | <0.001  | 1.82 (1.51~2.2)  | <0.001  | 2.18 (1.59~2.98) | <0.001  | 2.06 (1.44~2.94) | <0.001  |

\*For each 10-unit increase in the TyG-BMI

Model 1 was without covariate adjustment.

Model 2 was adjusted for age.

Model 3 was adjusted for age, family income, smoking status, alcohol use, physical activity.

Model 4 was adjusted for age, family income, smoking status, alcohol use, physical activity, diabetes, hypertension, high cholesterol, LDL, HDL, and HbA1c

TyG-BMI: triglyceride glucose-body mass index      CVD: cardiovascular disease
